# Supplementary material for: Facilitated extracellular electron transfer of Shewanella loihica PV-4 by antimony-doped tin oxide nanoparticles as active microelectrodes
Source: Royal Society of Chemistry journal article supplement (doi:10.1039/c5nr04765j), 2015-01-01
Supplement: c5nr04765j1.pdf [file c5nr04765j1.pdf]

## Supporting Information

# **Facilitated Extracellular Electron Transfer of *Shewanella loihica* PV-4 by Antimony-doped Tin Oxide Nanoparticles as Active Microelectrodes**

*Xiaojian Zhang, Huan Liu, Jinrong Wang, Guangyuan Ren, Beizhen Xie, Hong Liu,  
Ying Zhu\*, Lei Jiang*

Prof. Y. Zhu, Ms. X. Zhang, Dr. H. Liu, Ms. J. Wang, Mr. G. Ren

Key laboratory of Bio-inspired Smart Interfacial Science and Technology of Ministry  
of Education, School of Chemistry and Environment, Beihang University, Beijing  
100191, People's Republic of China.

E-mail: [zhuying@buaa.edu.cn](mailto:zhuying@buaa.edu.cn); Fax: +86 10-82338212

Prof. H. Liu, Dr. B. Xie

School of Biological Science and Medical Engineering, Beihang University, Beijing  
100191, People's Republic of China.

Prof. L. Jiang

Beijing National Laboratory for Molecular Sciences, Institute of Chemistry Chinese  
Academy of Sciences, Beijing, 100191, P.R. China

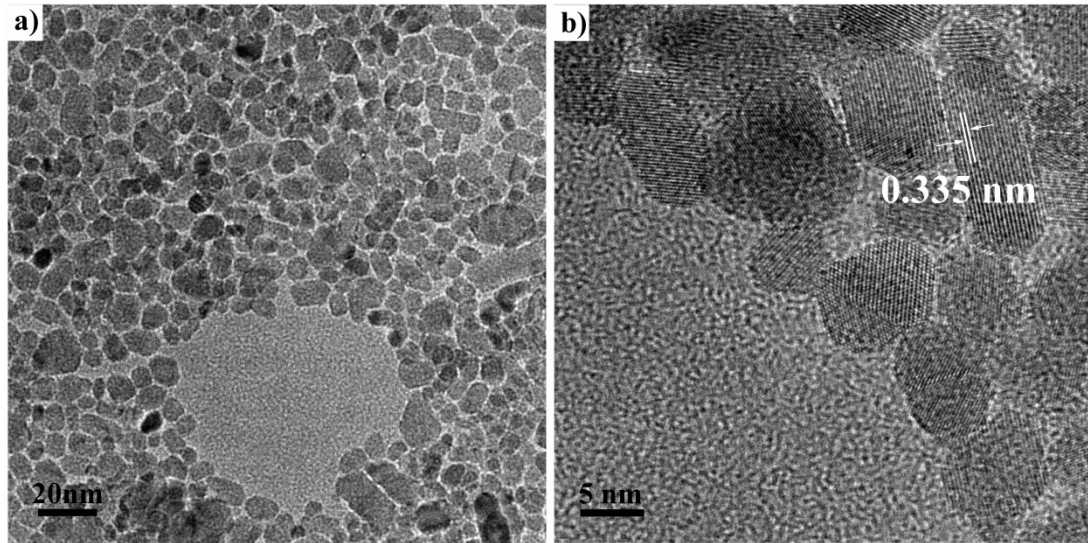

Fig. S1 TEM images of ATO nanoparticles used in the experiment. The lattice fringe spacing of ATO nanoparticles is 0.335 nm in the HRTEM image (b), in accordance with the 110 basal plane of rutile type  $\text{SnO}_2$  crystals.<sup>1</sup>

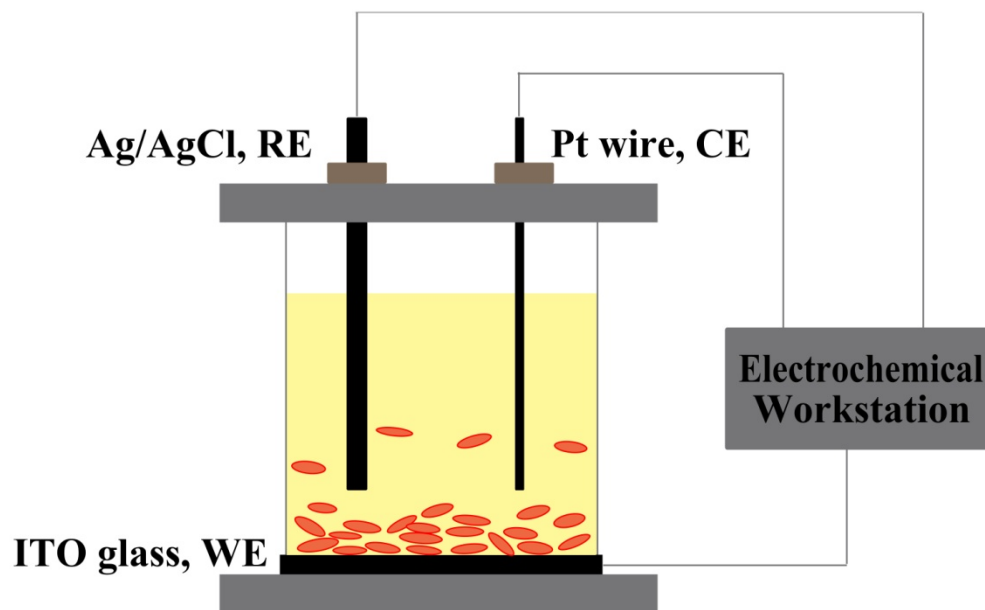

Fig. S2 The diagram of the electrochemical set up used in the experiment. It is a single-chamber, three-electrode system, including Ag|AgCl (saturated KCl) as reference electrode (RE), a platinum wire as counter electrode (CE), and an ITO glass placed on the bottom as working electrode (WE).

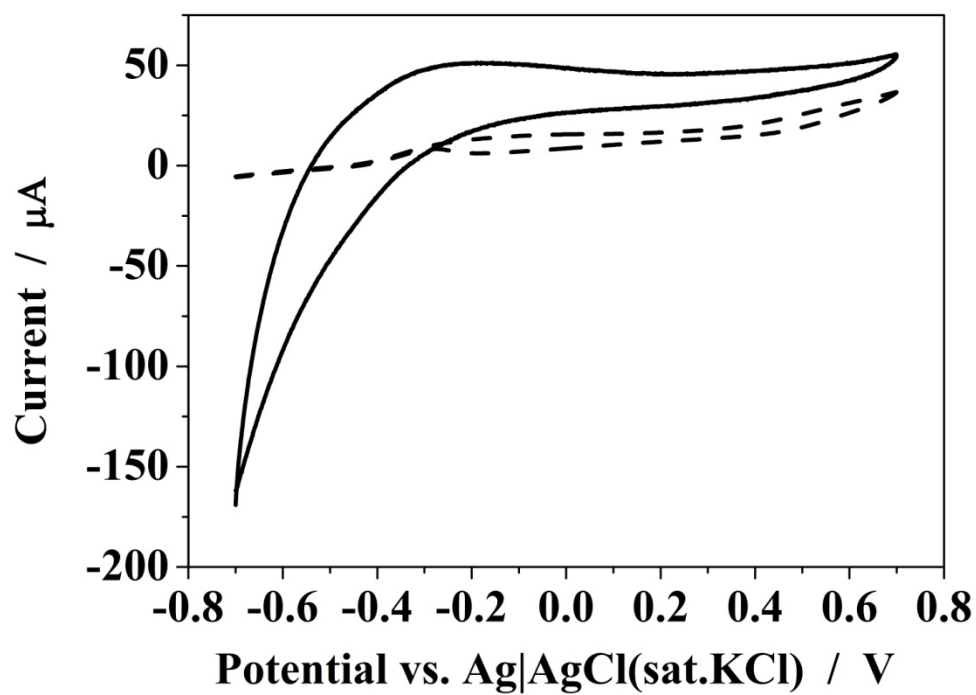

Fig. S3 Cyclic voltammetry curves of *S. loihica* PV-4 cells in the presence of 20 mM (solid curve) and 2 mM (dashed curve) ATO nanoparticles.

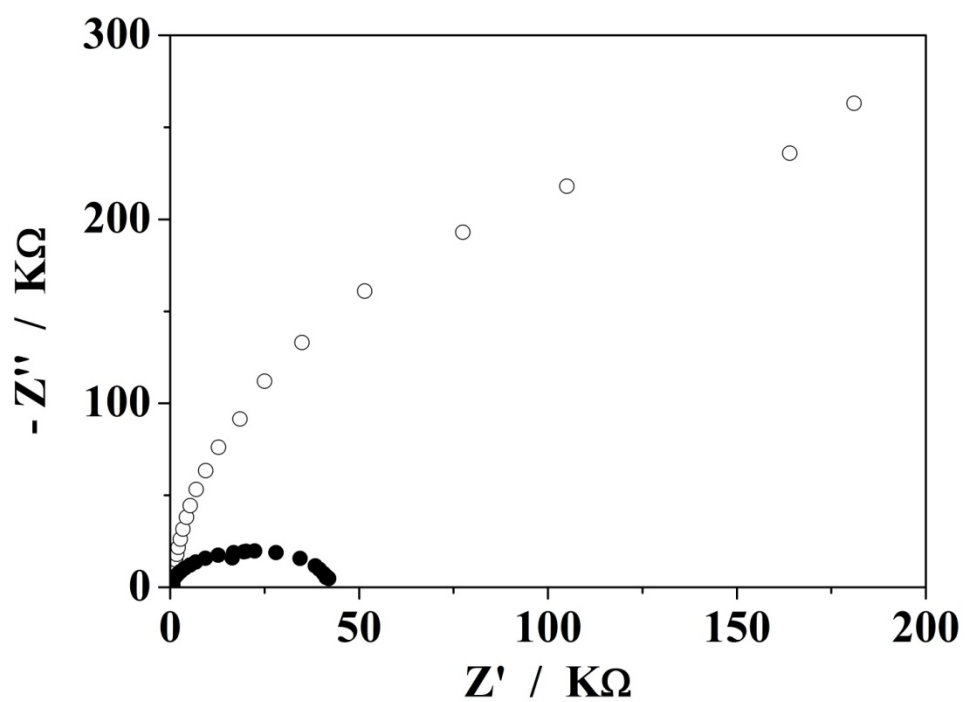

Fig. S4 Nyquist plots of the electrochemical impedance spectroscopy of the *S. loihica* PV-4 cells cultured on the ITO electrode in the presence (solid circle) and the absence (hollow circle) of ATO nanoparticles.

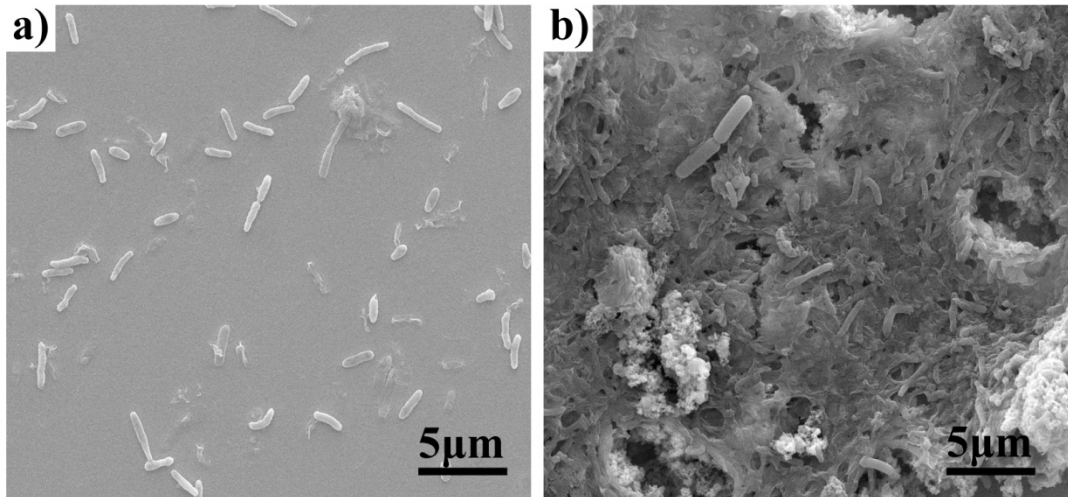

Fig. S5 SEM images of *S. loihica* PV-4 cells that fixed on the ITO electrode for the naturally occurring biofilm without ATO nanoparticles (a) and the biofilm formed in the presence of ATO nanoparticles (b).

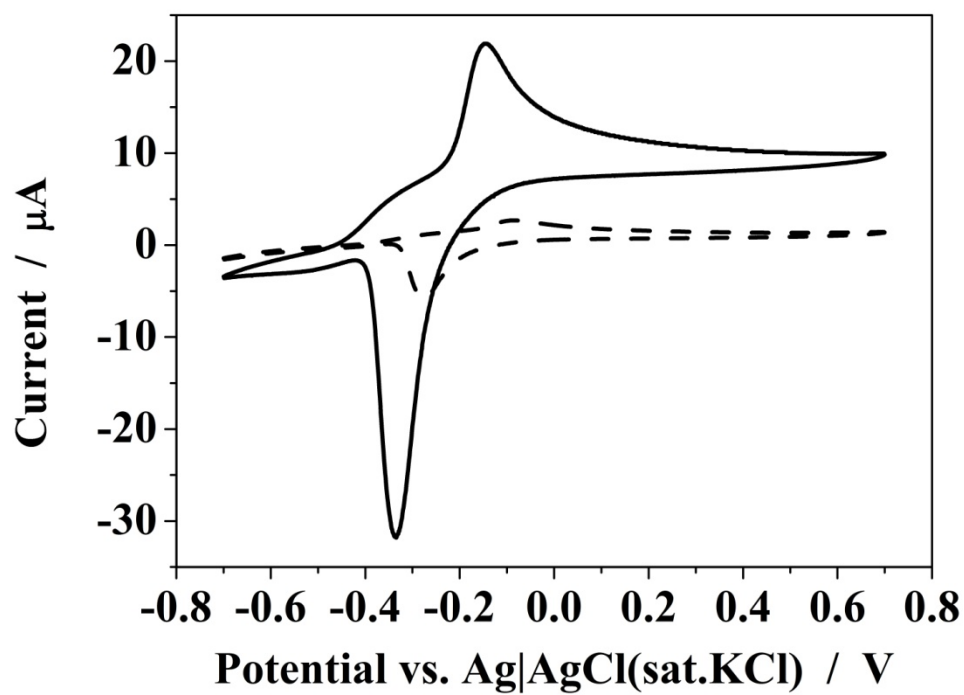

Fig. S6 Cyclic voltammetry curves of *S. loihica* PV-4 wild type (solid curve) and  $\Delta 2525$  mutant (dashed curve) cells cultured on ITO electrode at a scanning rate of  $1\text{mV} \cdot \text{s}^{-1}$ .

## Reference

1. K. Sakthiraj and K. Balachandrakumar, *Journal of Magnetism and Magnetic Materials*, 2015, **395**, 205-212.
